# Supplementary material for: A zirconium metal–organic framework with an exceptionally high volumetric surface area
Source: Royal Society of Chemistry journal article supplement (doi:10.1039/c7dt03394j), 2017-01-01

## checkCIF/PLATON report

You have not supplied any structure factors. As a result the full set of tests cannot be run.

THIS REPORT IS FOR GUIDANCE ONLY. IF USED AS PART OF A REVIEW PROCEDURE FOR PUBLICATION, IT SHOULD NOT REPLACE THE EXPERTISE OF AN EXPERIENCED CRYSTALLOGRAPHIC REFEREE.

No syntax errors found.      CIF dictionary      Interpreting this report

### Datablock: I

---

|                 |                 |                    |              |
|-----------------|-----------------|--------------------|--------------|
| Bond precision: | C-C = 0.0084 Å  | Wavelength=0.41328 |              |
| Cell:           | a=33.6644(6)    | b=33.6644(6)       | c=33.6644(6) |
|                 | alpha=90        | beta=90            | gamma=90     |
| Temperature:    | 100 K           |                    |              |
|                 | Calculated      | Reported           |              |
| Volume          | 38152(2)        | 38151.6(12)        |              |
| Space group     | F m -3 m        | Fm-3m              |              |
| Hall group      | -F 4 2 3        | ?                  |              |
| Moiety formula  | C54 H24 O16 Zr3 | C108 H48 O32 Zr6   |              |
| Sum formula     | C54 H24 O16 Zr3 | C108 H48 O32 Zr6   |              |
| Mr              | 1202.39         | 2404.78            |              |
| Dx,g cm-3       | 0.419           | 0.419              |              |
| Z               | 8               | 4                  |              |
| Mu (mm-1)       | 0.246           | 0.548              |              |
| F000            | 4768.0          | 4768.0             |              |
| F000'           | 4771.05         |                    |              |
| h,k,lmax        | 39,39,39        | 39,38,36           |              |
| Nref            | 1613            | 1591               |              |
| Tmin,Tmax       |                 | 0.947,0.947        |              |
| Tmin'           |                 |                    |              |

Correction method= MULTI-SCAN

Data completeness= 0.986      Theta(max)= 13.900

R(reflections)= 0.0879( 1191)      wR2(reflections)= 0.2378( 1591)

S = 1.063      Npar= Npar = 25

---

The following ALERTS were generated. Each ALERT has the format  
**test-name\_ALERT\_alert-type\_alert-level.**  
Click on the hyperlinks for more details of the test.

---

### 🟡 Alert level B

|                   |                                             |      |                              |       |    |      |       |
|-------------------|---------------------------------------------|------|------------------------------|-------|----|------|-------|
| PLAT230_ALERT_2_B | Hirshfeld Test Diff for                     | O2   | --                           | C1    | .. | 22.4 | su    |
| PLAT241_ALERT_2_B | High                                        | Ueq  | as Compared to Neighbors for | ..... |    | C1   | Check |
| PLAT242_ALERT_2_B | Low                                         | Ueq  | as Compared to Neighbors for | ..... |    | O2   | Check |
| PLAT250_ALERT_2_B | Large U3/U1 Ratio for Average U(i,j) Tensor | .... |                              |       |    | 6.3  | Note  |

### 🟢 Alert level C

|                   |                                                                         |             |                              |       |   |        |               |
|-------------------|-------------------------------------------------------------------------|-------------|------------------------------|-------|---|--------|---------------|
| THETM01_ALERT_3_C | The value of $\sin(\theta_{\max})/\text{wavelength}$ is less than 0.590 |             |                              |       |   |        |               |
|                   | Calculated $\sin(\theta_{\max})/\text{wavelength} = 0.5813$             |             |                              |       |   |        |               |
| PLAT242_ALERT_2_C | Low                                                                     | Ueq         | as Compared to Neighbors for | ..... |   | Zr1    | Check         |
| PLAT342_ALERT_3_C | Low Bond Precision on                                                   | C-C Bonds   | .....                        |       |   | 0.0084 | Ang.          |
| PLAT373_ALERT_2_C | Long                                                                    | C(sp)-C(sp) | Bond                         | C7    | - | C7_f   | ... 1.39 Ang. |

### 🟠 Alert level G

|                   |                                                                                                 |                               |                             |  |  |         |       |
|-------------------|-------------------------------------------------------------------------------------------------|-------------------------------|-----------------------------|--|--|---------|-------|
| ABSMU01_ALERT_1_G | Calculation of <code>_exptl_absorpt_correction_mu</code> not performed for this radiation type. |                               |                             |  |  |         |       |
| PLAT002_ALERT_2_G | Number of Distance or Angle Restraints on AtSite                                                |                               |                             |  |  | 6       | Note  |
| PLAT004_ALERT_5_G | Polymeric Structure Found with Dimension                                                        | .....                         |                             |  |  | 3       | Info  |
| PLAT005_ALERT_5_G | No <code>_iucr_refine_instructions_details</code> in the CIF                                    |                               |                             |  |  | Please  | Do !  |
| PLAT042_ALERT_1_G | Calc. and Reported MoietyFormula Strings                                                        | Differ                        |                             |  |  | Please  | Check |
| PLAT045_ALERT_1_G | Calculated and Reported Z Differ by                                                             | .....                         |                             |  |  | 2.00    | Ratio |
| PLAT072_ALERT_2_G | SHELXL First Parameter in WGHT Unusually Large.                                                 |                               |                             |  |  | 0.18    | Why ? |
| PLAT093_ALERT_1_G | No su's on H-positions, refinement reported as                                                  |                               |                             |  |  | mixed   |       |
| PLAT152_ALERT_1_G | The Supplied and Calc. Volume s.u. Differ by                                                    | ...                           |                             |  |  | 8       | Units |
| PLAT605_ALERT_4_G | Structure Contains Solvent Accessible VOIDS of                                                  |                               |                             |  |  | 30114   | A**3  |
| PLAT710_ALERT_4_G | Delete 1-2-3 or 2-3-4 Linear Torsion Angle                                                      | ... #                         |                             |  |  | 43      | Do !  |
|                   | C4 -C5 -C6 -C7                                                                                  | 180.00 0.00 1.555 1.555 1.555 |                             |  |  | 1.555   |       |
| PLAT710_ALERT_4_G | Delete 1-2-3 or 2-3-4 Linear Torsion Angle                                                      | ... #                         |                             |  |  | 44      | Do !  |
|                   | C4 -C5 -C6 -C7                                                                                  | 0.00 0.00 46.555 1.555 1.555  |                             |  |  | 1.555   |       |
| PLAT710_ALERT_4_G | Delete 1-2-3 or 2-3-4 Linear Torsion Angle                                                      | ... #                         |                             |  |  | 45      | Do !  |
|                   | C5 -C6 -C7 -C7                                                                                  | 0.00 0.00 1.555 1.555 1.555   |                             |  |  | 121.555 |       |
| PLAT764_ALERT_4_G | Overcomplete CIF Bond List Detected (Rep/Expd)                                                  |                               |                             |  |  | 1.47    | Ratio |
| PLAT794_ALERT_5_G | Tentative Bond Valency for Zr1 (IV)                                                             | .....                         |                             |  |  | 4.11    | Note  |
| PLAT860_ALERT_3_G | Number of Least-Squares Restraints                                                              | .....                         |                             |  |  | 17      | Note  |
| PLAT869_ALERT_4_G | ALERTS Related to the use of SQUEEZE Suppressed                                                 |                               |                             |  |  | !       | Info  |
| PLAT952_ALERT_5_G | Reported and Calculated $I_{\max}$ Values Differ by                                             | ..                            |                             |  |  | 3       | Check |
| PLAT984_ALERT_1_G | The C-f' =                                                                                      | 0.002                         | Deviates from the B&C-Value |  |  | 0.000   |       |
| PLAT984_ALERT_1_G | The O-f' =                                                                                      | 0.006                         | Deviates from the B&C-Value |  |  | 0.002   |       |
| PLAT984_ALERT_1_G | The Zr-f' =                                                                                     | -0.536                        | Deviates from the B&C-Value |  |  | 0.163   |       |
| PLAT985_ALERT_1_G | The Zr-f" =                                                                                     | 2.614                         | Deviates from the B&C-Value |  |  | 1.575   |       |

0 **ALERT level A** = Most likely a serious problem - resolve or explain  
4 **ALERT level B** = A potentially serious problem, consider carefully  
4 **ALERT level C** = Check. Ensure it is not caused by an omission or oversight  
22 **ALERT level G** = General information/check it is not something unexpected

9 ALERT type 1 CIF construction/syntax error, inconsistent or missing data  
8 ALERT type 2 Indicator that the structure model may be wrong or deficient  
3 ALERT type 3 Indicator that the structure quality may be low  
6 ALERT type 4 Improvement, methodology, query or suggestion  
4 ALERT type 5 Informative message, check

It is advisable to attempt to resolve as many as possible of the alerts in all categories. Often the minor alerts point to easily fixed oversights, errors and omissions in your CIF or refinement strategy, so attention to these fine details can be worthwhile. In order to resolve some of the more serious problems it may be necessary to carry out additional measurements or structure refinements. However, the purpose of your study may justify the reported deviations and the more serious of these should normally be commented upon in the discussion or experimental section of a paper or in the "special\_details" fields of the CIF. checkCIF was carefully designed to identify outliers and unusual parameters, but every test has its limitations and alerts that are not important in a particular case may appear. Conversely, the absence of alerts does not guarantee there are no aspects of the results needing attention. It is up to the individual to critically assess their own results and, if necessary, seek expert advice.

### **Publication of your CIF in IUCr journals**

A basic structural check has been run on your CIF. These basic checks will be run on all CIFs submitted for publication in IUCr journals (*Acta Crystallographica*, *Journal of Applied Crystallography*, *Journal of Synchrotron Radiation*); however, if you intend to submit to *Acta Crystallographica Section C* or *E*, you should make sure that full publication checks are run on the final version of your CIF prior to submission.

### **Publication of your CIF in other journals**

Please refer to the *Notes for Authors* of the relevant journal for any special instructions relating to CIF submission.

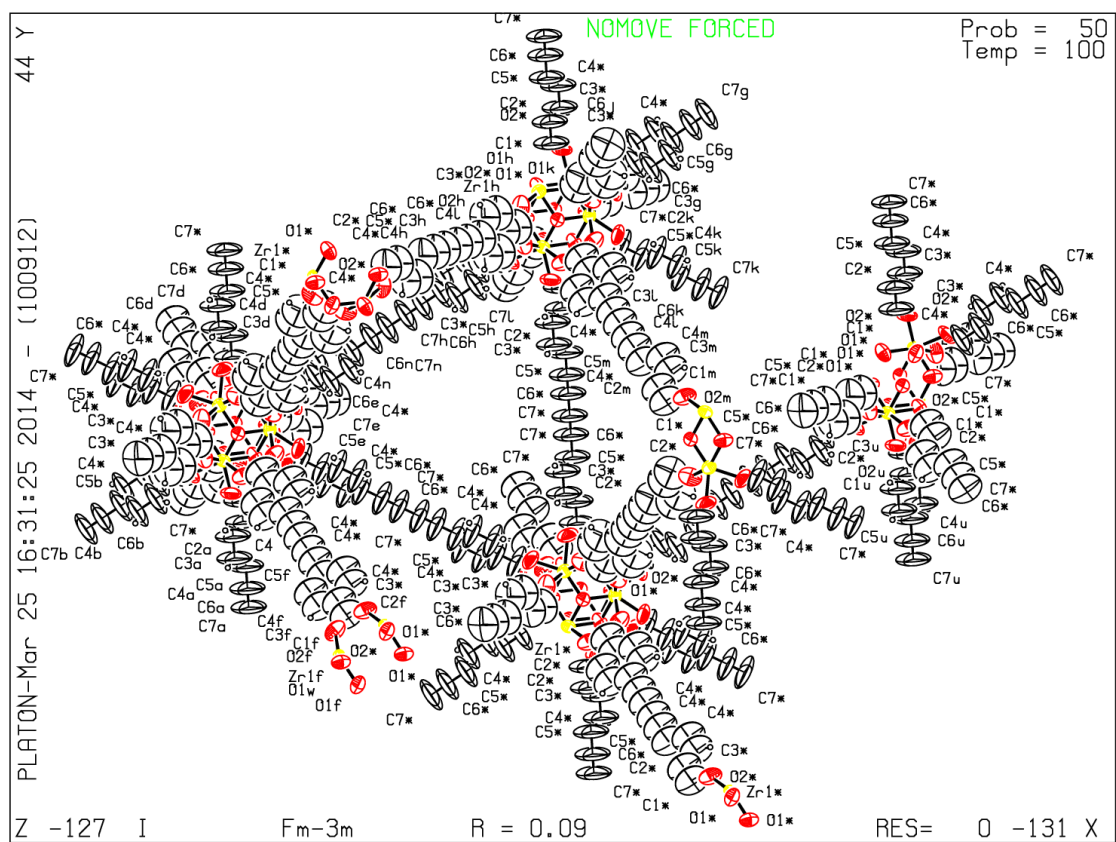

Supplement: c7dt03394j2.pdf [file c7dt03394j2.pdf]
